# Supplementary material
Source: Springer Nature journal article supplement (https://www.springermedizin.de/resource/supplementary/12933_2014_844_MOESM1_ESM.pdf/9539370)
Supplement: MOESM1 [file 9539370]

29 patients were approached

envelope method

3 patients withdrew

26 patients were enrolled and randomly assigned to one of two treatment groups

Control group  
(n=10)

Sitagliptin group  
(n=16)

Three-month treatment: Target HbA1c <8.0%

|                        |       |
|------------------------|-------|
| Biguanide              | (n=3) |
| Sulfonylurea           | (n=5) |
| Sulfonylurea+Biguanide | (n=2) |

|                                    |        |
|------------------------------------|--------|
| Sitagliptin                        | (n=10) |
| Sitagliptin+Biguanide              | (n=4)  |
| Sitagliptin+Biguanide+Sulfonylurea | (n=2)  |
